# Supplementary material for: Different prognostic implications of hepatic metastasis according to front-line treatment in non-small cell lung cancer: a real-world retrospective study
Source: PubMed Central journal article supplement — Transl Lung Cancer Res. 2021 Jun;10(6):2551–61. doi: 10.21037/tlcr-21-206 (PMC8264330; doi:10.21037/tlcr-21-206), 2021-06
Supplement: tlcr-10-06-2551-supplementary.pdf [file tlcr-10-06-2551-supplementary.pdf]

**Table S1** Comparison of baseline characteristics among treatment groups

|                         | Total       | Cytotoxic chemotherapy | Targeted therapy | Immunotherapy | P value |
|-------------------------|-------------|------------------------|------------------|---------------|---------|
| Number of patients      | 1470 (100)  | 723 (49.2)             | 678 (46.1)       | 69 (4.7)      |         |
| Age                     | 63.7±11.0   | 64.3±10.1              | 62.9±12.0        | 64.4±10.1     | 0.052   |
| Male sex                | 869 (59.1)  | 558 (77.2)             | 261 (38.5)       | 50 (72.5)     | <0.001  |
| Pathology               |             |                        |                  |               | <0.001  |
| Adenocarcinoma          | 1219 (82.9) | 517 (71.5)             | 657 (96.9)       | 45 (65.2)     |         |
| Squamous cell carcinoma | 194 (13.2)  | 166 (23.0)             | 11 (1.6)         | 17 (24.6)     |         |
| NOS                     | 26 (1.8)    | 14 (1.9)               | 8 (1.2)          | 4 (5.8)       |         |
| Others                  | 31 (2.1)    | 26 (3.6)               | 2 (0.3)          | 3 (4.3)       |         |
| EGFR                    |             |                        |                  |               | <0.001  |
| Wild Type               | 670 (45.6)  | 538 (74.4)             | 71 (10.5)        | 61 (88.4)     |         |
| Mutation                | 630 (42.9)  | 29 (4.0)               | 600 (88.5)       | 1 (1.4)       |         |
| Unknown                 | 170 (11.6)  | 156 (21.6)             | 7 (1.0)          | 7 (10.1)      |         |
| ALK                     |             |                        |                  |               | <0.001  |
| Wild Type               | 1141 (77.6) | 521 (72.1)             | 558 (82.3)       | 62 (90.0)     |         |
| Mutation                | 94 (6.4)    | 27 (3.7)               | 67 (9.9)         | 0 (0.0)       |         |
| Unknown                 | 235 (16.0)  | 175 (24.2)             | 53 (7.8)         | 7 (10.1)      |         |
| PD-L1                   |             |                        |                  |               | <0.001  |
| Negative                | 210 (14.3)  | 99 (13.7)              | 98 (14.5)        | 13 (18.8)     |         |
| Positive                | 618 (42.0)  | 341 (47.2)             | 239 (35.3)       | 38 (55.1)     |         |
| Unknown                 | 642 (43.7)  | 283 (39.1)             | 341 (50.3)       | 18 (26.1)     |         |

NOS, not otherwise specified; EGFR, epidermal growth factor receptor; ALK, anaplastic lymphoma kinase; PD-L1, programmed death-ligand.

**Table S2** PD-L1 status in the immunotherapy group

|         | Total (n=69) | Liver metastasis (n=11) | No liver metastasis (n=58) |
|---------|--------------|-------------------------|----------------------------|
| ≥50%    | 27 (39.1)    | 5 (45.5)                | 22 (37.9)                  |
| 1–49%   | 11 (15.9)    | 2 (18.2)                | 9 (15.5)                   |
| <1%     | 13 (18.8)    | 2 (18.2)                | 11 (19.0)                  |
| Unknown | 18 (26.1)    | 2 (18.2)                | 16 (27.6)                  |

PD-L1, programmed death-ligand 1.

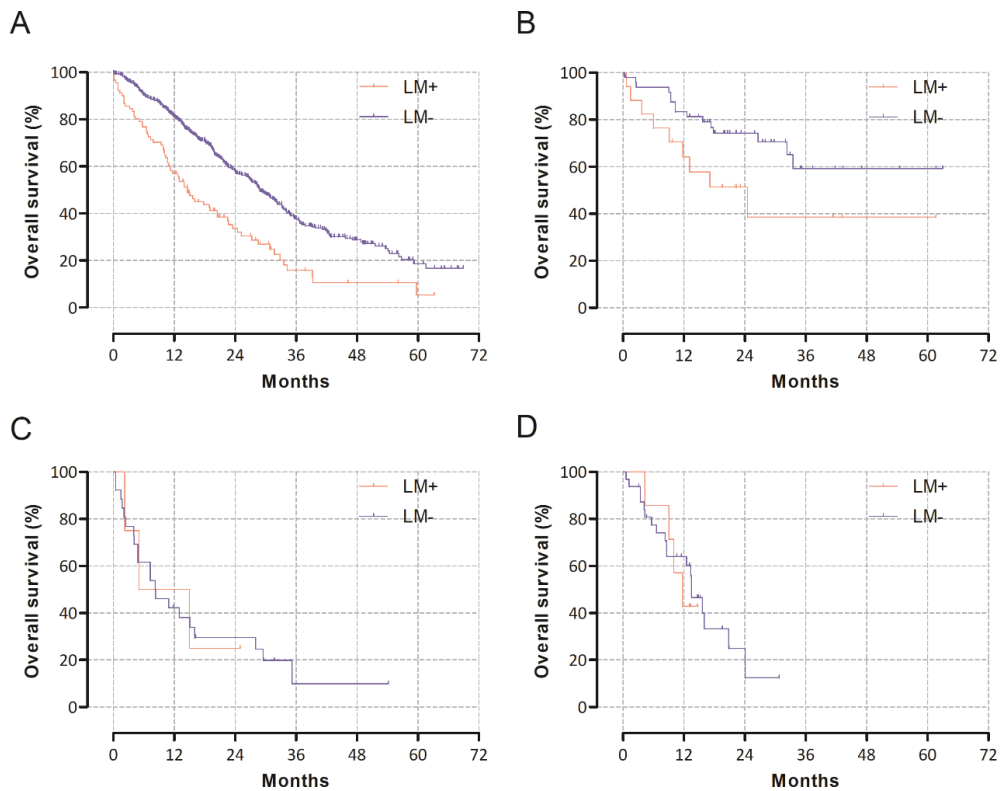

**Figure S1** Subgroup analysis for overall survival with respect to liver metastasis. (A) EGFR-TKI subgroup in the targeted therapy group,  $P < 0.001$  [median OS: 14.6 (LM+) *vs.* 28.8 months (LM-)]. (B) ALK-TKI subgroup in the targeted therapy group,  $P = 0.041$  [median OS: 24.5 (LM+) *vs.* N/E months (LM-)]. (C) Immunotherapy alone subgroup in the immunotherapy group,  $P = 0.944$  [median OS: 10.1 (LM+) *vs.* 8.4 months (LM-)]. (D) Combination therapy subgroup in the immunotherapy group,  $P = 0.772$  [median OS: 11.7 (LM+) *vs.* 13.5 months (LM-)]. EGFR, epidermal growth factor receptor; TKI, tyrosine kinase inhibitors; OS, overall survival; LM, liver metastasis; ALK, anaplastic lymphoma kinase.

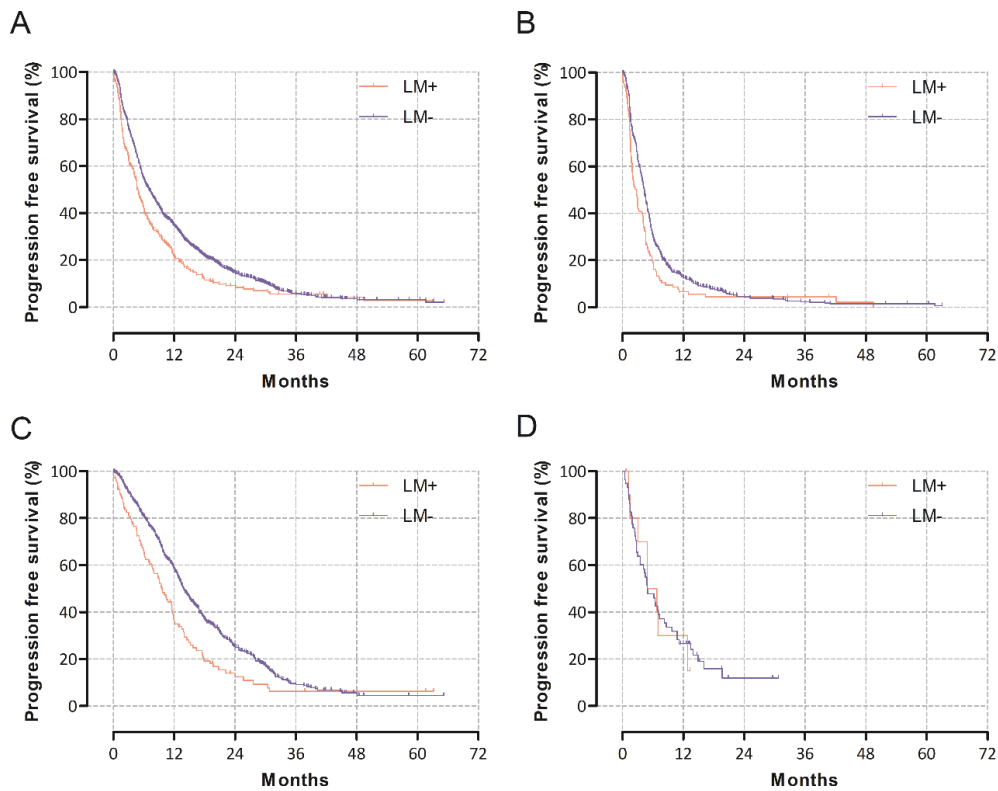

**Figure S2** Progression-free survival according to liver metastasis. (A) Entire study population ( $P<0.001$ , median PFS: 4.7 (LM+) *vs.* 7.0 months (LM-)). (B) Cytotoxic chemotherapy ( $P=0.002$ , median PFS: 2.8 (LM+) *vs.* 4.3 months (LM-)). (C) Targeted therapy ( $P<0.001$ , median PFS: 9.6 (LM+) *vs.* 13.8 months (LM-)). (D) Immunotherapy ( $P=0.955$ , median PFS: 4.9 (LM+) *vs.* 4.9 months (LM-)). PFS, progression-free survival; LM, liver metastasis.

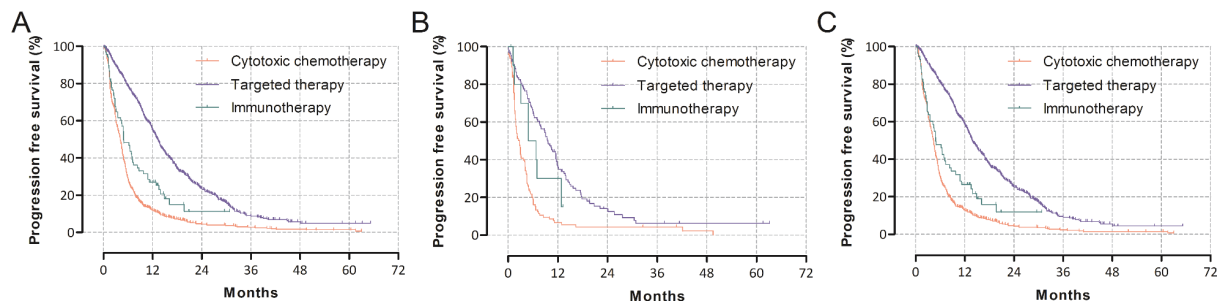

**Figure S3** Progression-free survival according to treatment. (A) Entire population of metastatic NSCLC patients [P<0.001, median PFS: 4.1 (cytotoxic) *vs.* 13.3 (target) *vs.* 4.9 (IO) months]. (B) NSCLC with liver metastasis [P<0.001, median PFS: 2.8 (cytotoxic) *vs.* 9.6 (target) *vs.* 4.9 (IO) months]. (C) Metastatic NSCLC other than in the liver [P<0.001, median PFS: 4.3 (cytotoxic) *vs.* 13.8 (target) *vs.* 4.9 (IO) months]. NSCLC, non-small cell lung cancer; PFS, progression-free survival; IO, immunotherapy.

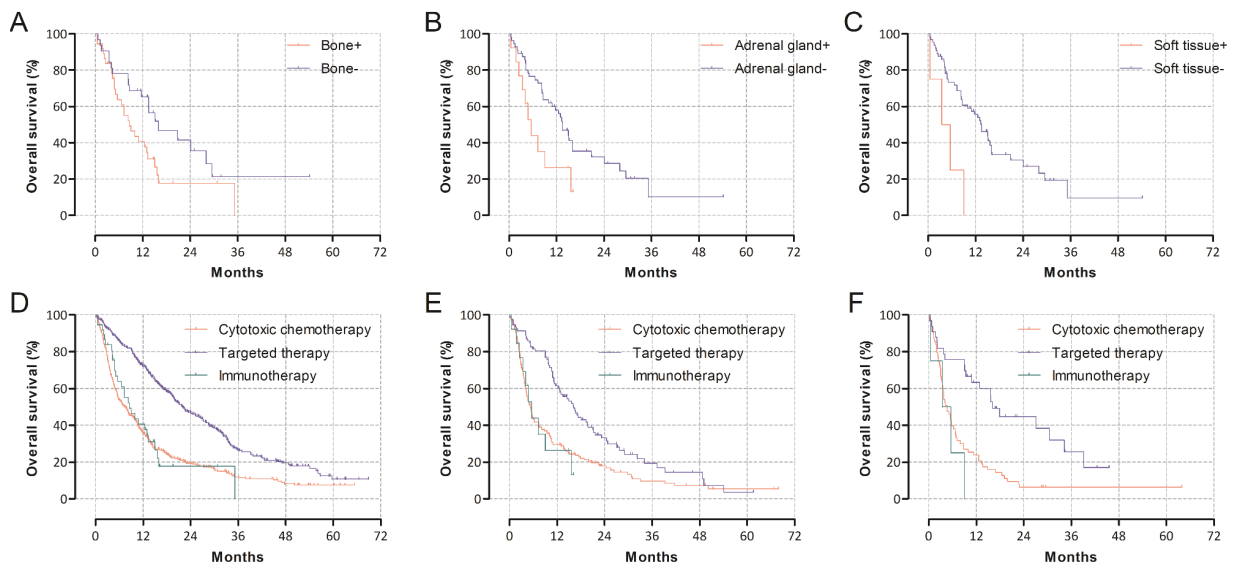

**Figure S4** Overall survival with metastasis sites other than the liver. (A,B,C) Overall survival in patients who received immunotherapy with respect to the presence of metastasis (A. bone, P=0.033; B. adrenal gland, P=0.035; C. soft tissue, P=0.005). (D,E,F) Overall survival with respect to first-line chemotherapy (D. bone, P<0.001; E. adrenal gland, P<0.001; F. soft tissue metastasis, P<0.001).

**Table S3** Cox regression analysis for progression-free survival

| Variables                  | Univariate analysis |             |         | Multivariate analysis |              |         |
|----------------------------|---------------------|-------------|---------|-----------------------|--------------|---------|
|                            | HR                  | 95% CI      | P value | HR                    | 95% CI       | P value |
| Age                        | 1.008               | 1.003–1.013 | 0.003   | 1.006                 | 1.000–0.011  | 0.049   |
| Male sex                   | 1.531               | 1.363–1.719 | <0.001  | 1.155                 | 1.018–1.311  | 0.026   |
| Pathology                  |                     |             |         |                       |              |         |
| Adenocarcinoma             | 1.000               |             |         | 1.000                 |              |         |
| Squamous cell carcinoma    | 2.270               | 1.931–2.669 | <0.001  | 1.619                 | 1.261–2.078  | <0.001  |
| EGFR mutation              | 0.474               | 0.419–0.536 | <0.001  | 0.420                 | 0.366–0.482  | <0.001  |
| ALK mutation               | 0.733               | 0.572–0.939 | 0.014   | 0.424                 | 0.323–0.557  | <0.001  |
| PD-L1 positive             | 1.147               | 0.966–1.361 | 0.119   |                       | Not retained |         |
| Metastasis site            |                     |             |         |                       |              |         |
| Liver                      | 1.356               | 1.165–1.579 | <0.001  | 1.187                 | 1.009–1.395  | 0.039   |
| Contralateral lung         | 0.985               | 0.873–1.111 | 0.804   |                       | Not retained |         |
| Extrathoracic lymph node   | 1.325               | 1.180–1.488 | <0.001  | 1.086                 | 0.945–1.248  | 0.245   |
| Pleura                     | 0.962               | 0.859–1.078 | 0.507   |                       | Not retained |         |
| Bone                       | 1.177               | 1.051–1.319 | 0.005   | 1.198                 | 1.049–1.368  | 0.008   |
| Brain                      | 0.850               | 0.752–0.960 | 0.009   | 0.966                 | 0.837–1.115  | 0.637   |
| Adrenal gland              | 1.707               | 1.475–1.976 | <0.001  | 1.462                 | 1.250–1.710  | <0.001  |
| Soft tissue                | 1.542               | 1.241–1.916 | <0.001  | 1.172                 | 0.932–1.473  | 0.174   |
| Number of metastatic sites |                     |             |         |                       |              |         |
| One                        | 1.000               |             |         | 1.000                 |              |         |
| Two                        | 1.156               | 0.994–1.343 | 0.060   | 1.034                 | 0.884–1.210  | 0.676   |
| More than three            | 1.397               | 1.220–1.599 | <0.001  | 1.301                 | 1.101–1.539  | 0.002   |

EGFR, epidermal growth factor receptor; ALK, anaplastic lymphoma kinase; PD-L1, programmed death-ligand 1; CI, confidence interval; HR, hazard ratio.
